# Supplementary material
Source: Springer Nature journal article supplement (https://www.springermedizin.de/resource/supplementary/12986_2009_224_MOESM1_ESM.pdf/25655624)
Supplement: MOESM1 [file 25655624]

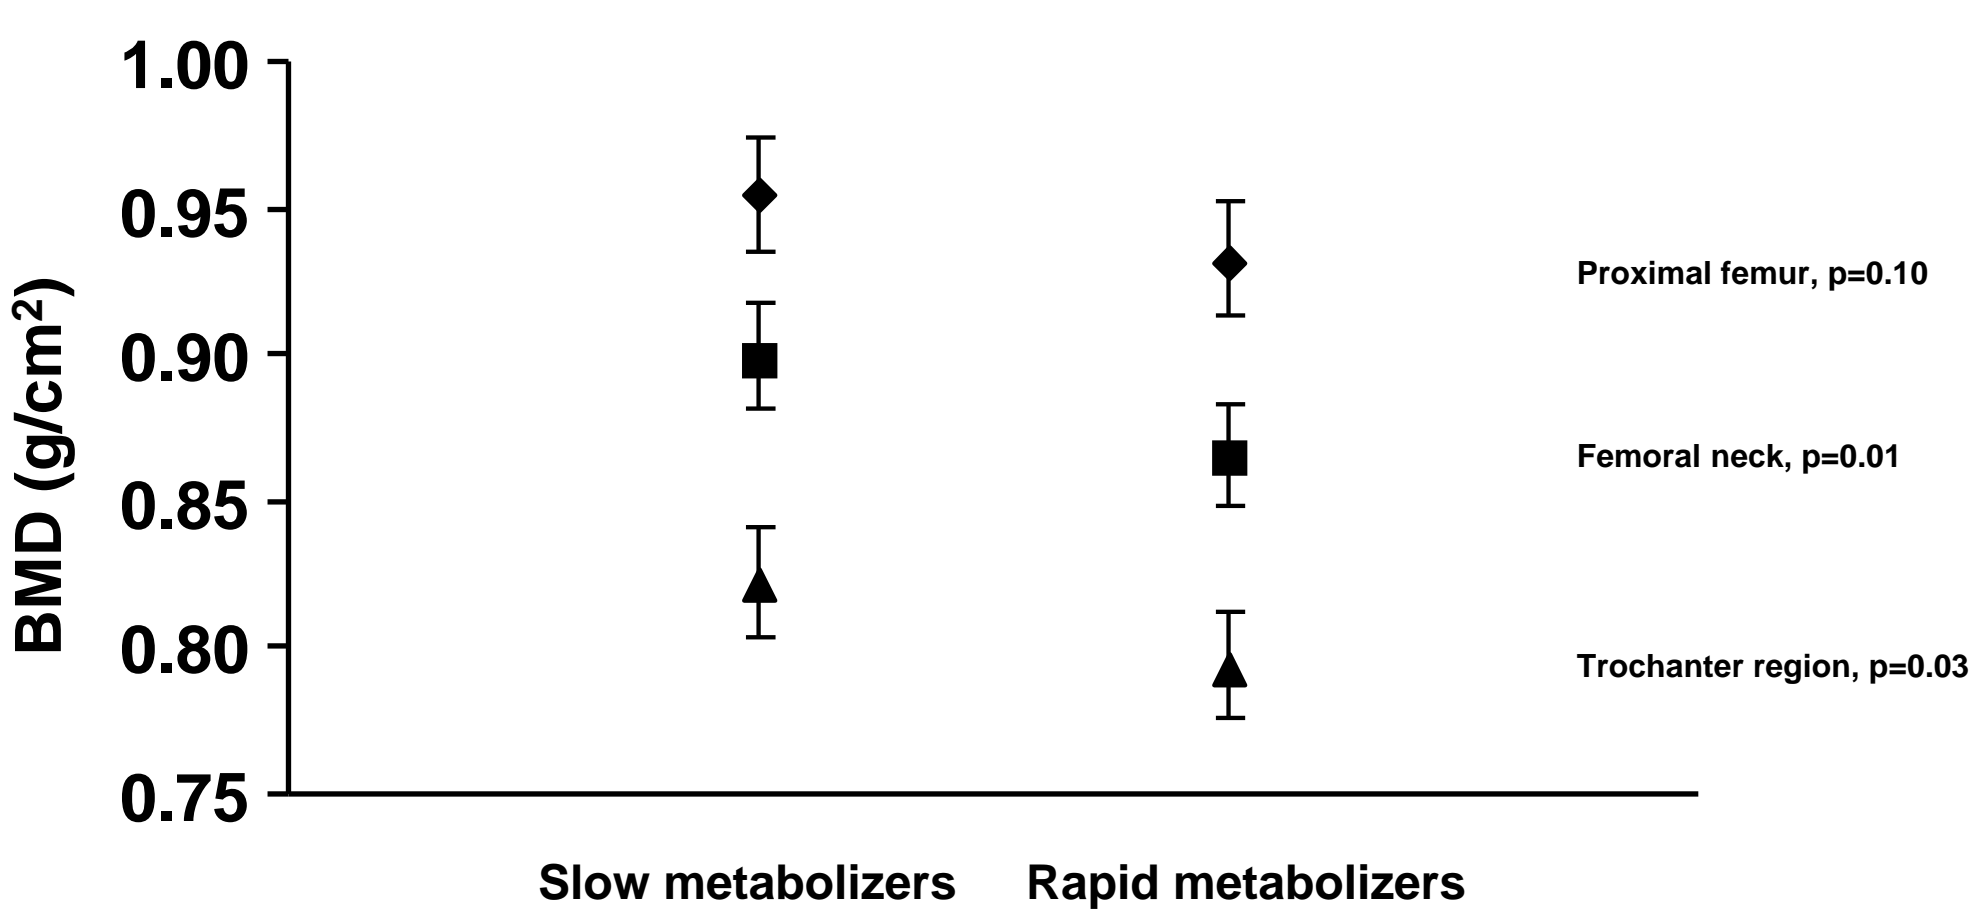

1.00  
0.95  
0.90  
0.85  
0.80  
0.75

BMD (g/cm<sup>2</sup>)

Slow metabolizers

Rapid metabolizers

Proximal femur, p=0.10

Femoral neck, p=0.01

Trochanter region, p=0.03
